# Supplementary material
Source: publisher figshare collection journal article supplement (https://acs.figshare.com/ndownloader/files/5191249)
Supplement: Supplementary file 1 [file 5191249]

## Supporting Information

**Figure 1.** The  $^{31}\text{P}$  MAS SSNMR spectra of **1**

**Figure 2.** The TGA trace and first derivative of the mass loss of **1**

**Figure 3.** The TGA trace and first derivative of the mass loss of **2**

**Figure 4.** The  $^{31}\text{P}$  MAS SSNMR spectra of **3**

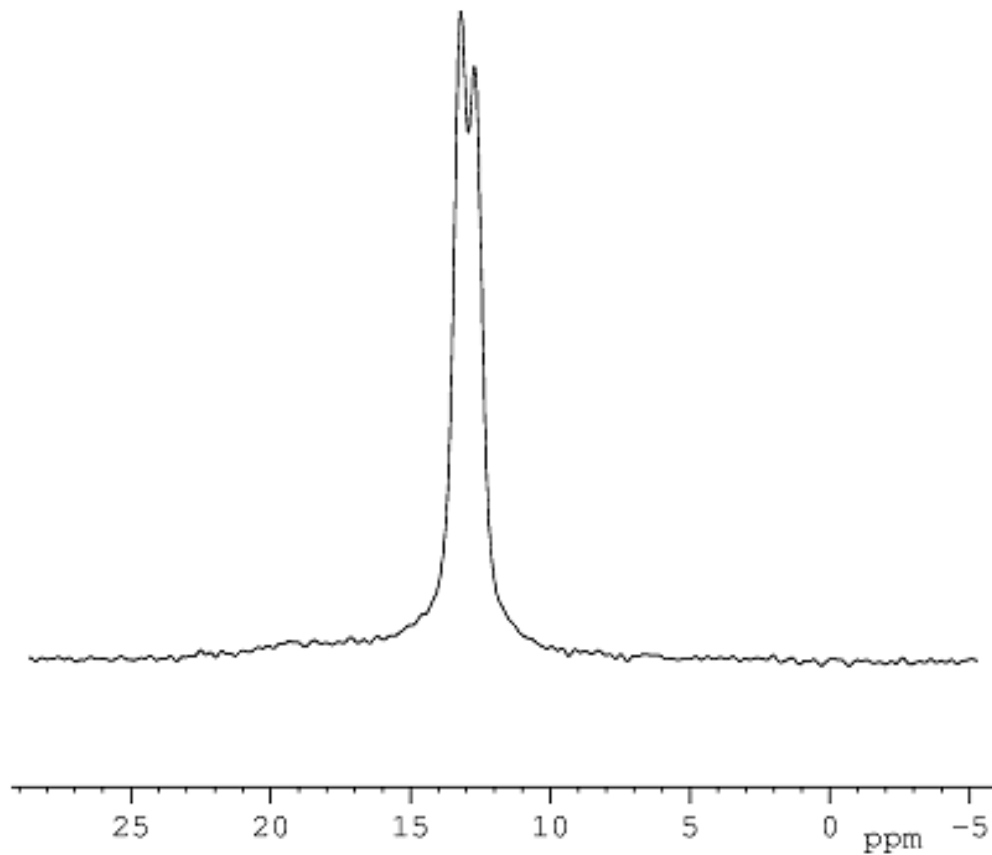

Figure 1

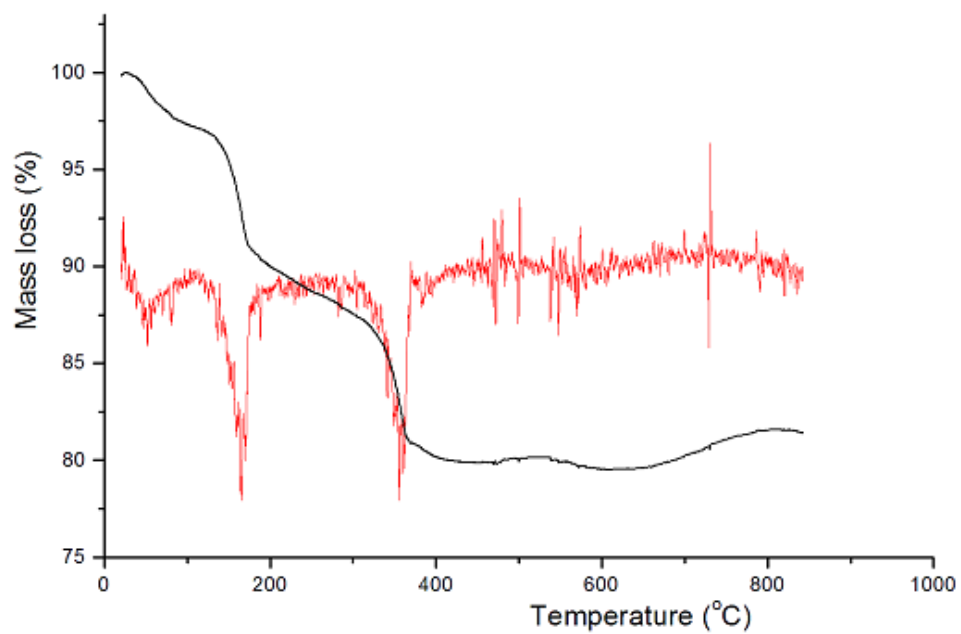

Figure 2

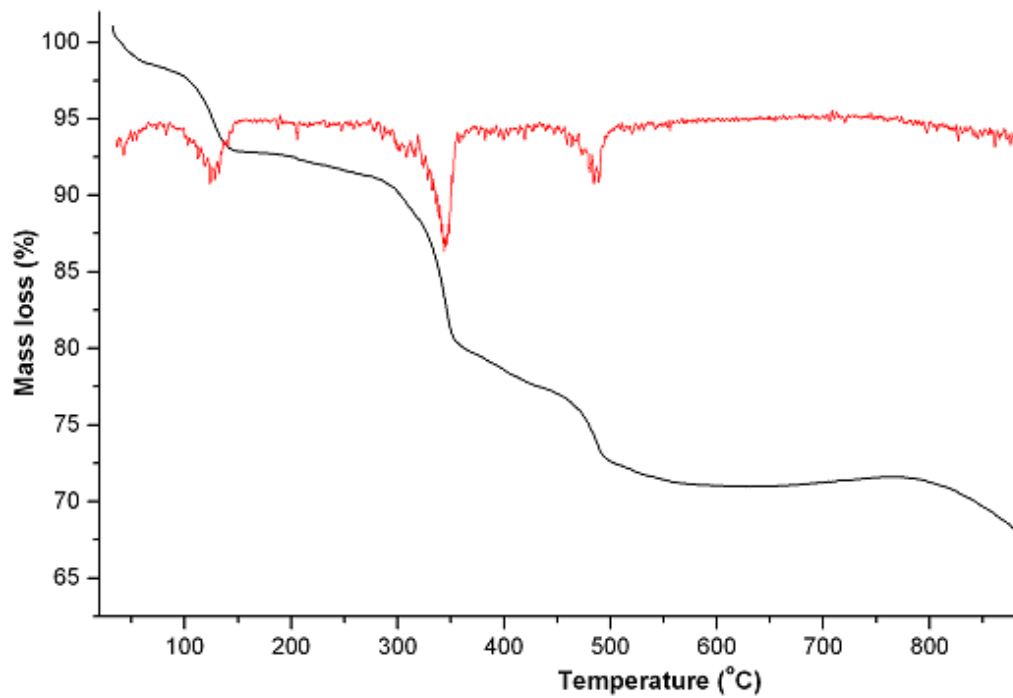

Figure 3

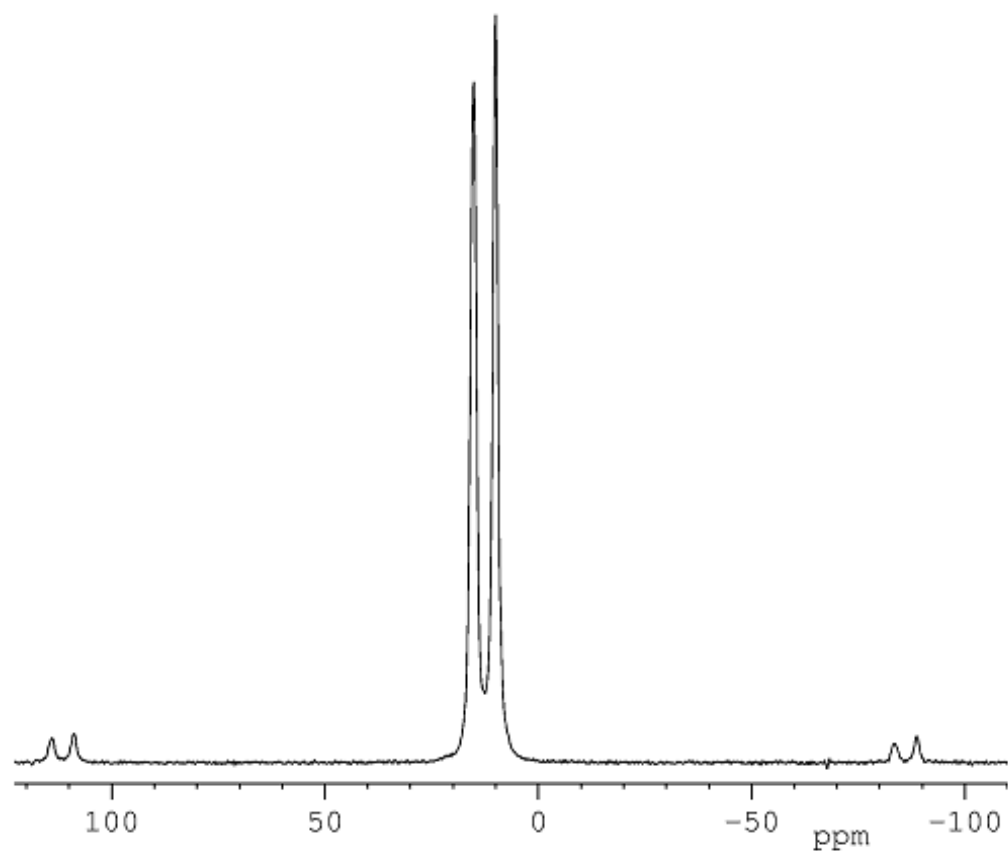

Figure 4
